## Ephrin-B ligands play a dual role in the control of neural crest cell migration

Alicia Santiago\* and Carol A. Erickson

Section of Molecular and Cellular Biology, University of California-Davis, Davis, California 95616, USA

\*Corresponding author (e-mail: asantiago@ucdavis.edu)

Accepted 13 May 2002

### SUMMARY

Little is known about the mechanisms that direct neural crest cells to the appropriate migratory pathways. Our aim was to determine how neural crest cells that are specified as neurons and glial cells only migrate ventrally and are prevented from migrating dorsolaterally into the skin, whereas neural crest cells specified as melanoblasts are directed into the dorsolateral pathway. Eph receptors and their ephrin ligands have been shown to be essential for migration of many cell types during embryonic development. Consequently, we asked if ephrin-B proteins participate in the guidance of melanoblasts along the dorsolateral pathway, and prevent early migratory neural crest cells from invading the dorsolateral pathway. Using Fc fusion proteins, we detected the expression of ephrin-B ligands in the dorsolateral pathway at the stage when neural crest cells are migrating ventrally. Furthermore, we show that ephrins block dorsolateral migration of early-migrating neural crest cells because when we disrupt the Eph-ephrin interactions by addition of soluble ephrin-B ligand to trunk explants, early neural crest cells migrate inappropriately into the dorsolateral pathway. Surprisingly, we discovered the ephrin-B ligands continue to be expressed along the dorsolateral pathway during melanoblast migration. RT-PCR analysis, *in situ* hybridisation, and cell surface-labelling of neural crest cell cultures demonstrate that melanoblasts express several

EphB receptors. In adhesion assays, engagement of ephrin-B ligands to EphB receptors increases melanoblast attachment to fibronectin. Cell migration assays demonstrate that ephrin-B ligands stimulate the migration of melanoblasts. Furthermore, when Eph signalling is disrupted *in vivo*, melanoblasts are prevented from migrating dorsolaterally, suggesting ephrin-B ligands promote the dorsolateral migration of melanoblasts. Thus, transmembrane ephrins act as bifunctional guidance cues: they first repel early migratory neural crest cells from the dorsolateral path, and then later stimulate the migration of melanoblasts into this pathway. The mechanisms by which ephrins regulate repulsion or attraction in neural crest cells are unknown. One possibility is that the cellular response involves signalling to the actin cytoskeleton, potentially involving the activation of Cdc42/Rac family of GTPases. In support of this hypothesis, we show that adhesion of early migratory cells to an ephrin-B-derivatized substratum results in cell rounding and disruption of the actin cytoskeleton, whereas plating of melanoblasts on an ephrin-B substratum induces the formation of microspikes filled with F-actin.

Key words: Ephrins, Eph receptors, Cell migration, Neural crest, Melanoblasts, Chicken

### INTRODUCTION

Neural crest cells arise from the dorsal neural tube and migrate along defined pathways to specific sites in the embryo, where they give rise to many derivatives, including most of the neurons and glia of the peripheral nervous system, the craniofacial skeleton and nearly all the pigment cells (Le Douarin and Kalcheim, 1999). In the trunk of the avian embryo, neural crest cells take two distinct pathways. Initially, they migrate ventrally between the neural tube and somite and through the anterior sclerotome (Rickmann et al., 1985; Bronner-Fraser, 1986; Loring and Erickson, 1987; Teillet et al., 1987) and coalesce to form the adrenal medulla and the neurons and glia of the dorsal root ganglia and sympathetic ganglia. Cells emigrating from the neural tube 12-18 hours later invade the dorsolateral pathway, between the dermomyotome and the overlying ectoderm (Serbedzija et al.,

1989; Erickson et al., 1992), where they colonize the skin and differentiate as melanocytes. Thus, early and late migrating neural crest cells from the trunk region are distinct subpopulations with different migratory behaviours and developmental fates.

The mechanisms responsible for dictating the timing and patterning of neural crest migration are not well understood, although one aspect of pattern regulation in the ventral pathway has been clarified. Specifically, the Eph receptor tyrosine kinases and their ephrin ligands have been shown to be essential for the segmental migration of neural crest cells (Krull et al., 1997; Wang and Anderson, 1997). Studies of the expression of Eph receptors and ephrins in the somites show that in the avian embryo EphB3 is expressed by ventrally migrating neural crest cells, and Ephrin-B1 is expressed in the posterior half of the somites, whereas in rodents, ephrin-B2 is transcribed in the posterior somite and EphB2 is expressed by

neural crest cells. The interaction between the Eph receptors expressed by ventrally migrating neural crest cells and the ephrin ligands expressed in the posterior sclerotome mediate a repulsive response that restricts the migration of the cells to the anterior half of each somite. However, as there is normal migration of trunk neural crest cells in the homozygous double mutants of *EphB2* and *EphB3* (Wang and Anderson, 1997), it is likely that other EphB receptors are expressed by neural crest cells that compensate for the loss of EphB2 function. In addition, mice lacking ephrin-B2 have a normal pattern of neural crest migration (Wang et al., 1998; Adams et al., 1999). This may be due to the presence of functionally redundant guidance cues in the somites. Other cases of Eph-ephrin mediated repulsive behaviour have been reported. For example, these molecules restrict cell or neuronal growth cone movement, thereby preventing cells or axons from entering inappropriate territories in the embryo (Dottori et al., 1998; Drescher et al., 1995; Helmbacher et al., 2000; Henkemeyer et al., 1994; Imondi et al., 2000; Nakamoto et al., 1996; Orioli et al., 1996; Park et al., 1997; Smith et al., 1997). The repulsive response is believed to be mediated by rearrangements in the cytoskeleton that lead to the collapse of growth cones in neuronal cells (Meima et al., 1997).

A still unresolved question is how neural crest cells are directed along the dorsolateral migratory pathway. Migration into the dorsolateral path depends upon the lineage specification of the cells. Immunolabelling experiments show that neural crest cells are specified as melanoblasts prior to entering the dorsolateral path and that they are the only neural crest cells that migrate dorsolaterally (Kitamura et al., 1992; Reedy et al., 1998). Neural crest cells from the ventral pathway do not have the ability to invade the dorsolateral path, as demonstrated by grafting non-melanoblast neural crest cells into a host embryo whose endogenous neural crest cells have begun to migrate dorsolaterally (Erickson and Goins, 1995). In contrast, when melanoblasts are grafted into a young host whose endogenous crest cells are only migrating ventrally, the melanoblasts will immediately migrate dorsolaterally. Taken together, these experiments demonstrate that only melanoblasts, and no other neural crest cells, possess the ability to migrate dorsolaterally.

We wanted to identify the cues in the dorsolateral path that initially inhibit the ventrally migrating crest from entering that space, but yet later allow melanoblasts to migrate along this pathway. The expression of two inhibitory factors in the dermomyotome, chondroitin sulphate glycoconjugates, and peanut agglutinin (PNA)-binding glycoproteins, correlate with the initial inhibition of neural crest entry into the dorsolateral pathway (Oakley et al., 1994). Loss of these two markers by ablation of the dermomyotome allows neural crest cells to enter the dorsolateral path precociously (Erickson et al., 1992; Oakley et al., 1994). Furthermore, the expression of these molecules is downregulated at the time that neural crest cells initiate migration along the dorsolateral pathway. These results suggest that neural crest cells might be transiently inhibited from migrating on the dorsolateral path because of the expression of chondroitin-6-sulfate proteoglycan and PNA-binding molecules. However, these results cannot explain how melanoblasts grafted into the early embryo can overcome the dorsolateral barrier. Transmembrane ephrins have also been reported to be present along the dorsolateral pathway at the

time neural crest cells are migrating (Krull et al., 1997; Wang and Anderson, 1997), suggesting that ephrins might repel ventrally migrating neural crest cells from the dorsolateral path.

In the present study, we confirm that the dorsolateral path is filled with ephrins at the time when neural crest cells move exclusively ventrally. When we perturb Eph receptor function in neural crest cells in trunk explants, the early migrating neural crest disperse dorsolaterally, demonstrating that ephrins block early dorsolateral migration. Surprisingly, we found that transmembrane ephrins are also expressed along the dorsolateral pathway during melanoblast migration and that melanoblasts express several EphB receptors. If Eph receptor function is blocked in vivo at the time when melanoblasts are migrating, this subpopulation of neural crest cells fail to migrate into the dorsolateral pathway. Moreover, in vitro cell migration assays demonstrate that ephrins promote melanoblast migration, not inhibit it. These results show that transmembrane ephrins actively promote the migration of neural crest cells into the dorsolateral path. Adhesion and motility assays suggest that engagement of ephrin-B ligands by EphB receptors promote melanoblast motility by increasing their adhesion to fibronectin.

## MATERIALS AND METHODS

### Receptor and ligand fusion protein staining

EphB2-Fc receptor and ephrin-B1-Fc ligand fusion proteins were obtained from Dr Nicholas Gale at Regeneron Pharmaceuticals. Whole-mount staining of chicken embryos using IgG-Fc-tagged ligand and receptor was performed essentially as described by Gale et al. (Gale et al., 1996a). After removal of the extraembryonic membranes, stage 12-24 embryos (Hamburger and Hamilton, 1951) were blocked with 10% goat serum and 2% bovine serum albumin in phosphate-buffered saline (PBS). Embryos were then incubated overnight at 4°C with receptor-Fc (5 µg/ml in 0.5× blocking solution). Embryos were repeatedly washed with PBS and then fixed with 4% paraformaldehyde (PFA). To inactivate endogenous phosphatases, embryos were incubated at 70°C for 1 hour and again blocked in 0.5× blocking solution plus 0.1% Triton X-100 followed by incubation overnight at 4°C in an alkaline phosphatase (AP)-conjugated goat anti-human antibody (1:1000; Promega). After extensive washing in Tris-buffered saline (TBS) plus 0.1% Triton X-100, embryos were transferred to AP buffer (100 mM Tris-HCl pH 9.5, 100 mM NaCl, 5 mM MgCl<sub>2</sub>) with NBT (0.34 mg/ml) and BCIP (0.18 mg/ml; Sigma). Following color development, embryos were rinsed in PBS and fixed in 4% PFA. Stained embryos were viewed using a Leica stereomicroscope and images were captured using an Optronics Magnafire camera.

Cultured neural crest cells (see below) were incubated with Fc alone or ephrin-B1-Fc for 1 hour at room temperature. Cells were rinsed in PBS and fixed in 4% PFA for 10 minutes. Bound ephrin-Fc was detected using AP-conjugated goat anti-Fc, and AP activity was detected by incubation with NBT/BCIP (Sigma), as described above.

### Quail neural crest cultures and immunofluorescence

Fertile Japanese quail eggs (*Coturnix japonica*) from the Animal Sciences Department (University of California, Davis) were incubated in a humidified 37°C incubator until they reached stage 13. Neural tubes at somite level I to VIII (between the last-formed somite to the eight from the last-formed somite) were dissected from embryos and separated from surrounding tissues, including ectoderm, somite and notochord, after a brief digestion in Pancreatin (Gibco). Cleaned

neural tubes were transferred to 35-mm tissue culture dishes (Falcon) and maintained in Ham's F12 medium (Gibco), supplemented with 10% fetal calf serum, 3% 10-day chick embryo extract and 100 units/ml penicillin/streptomycin (Gibco). Cultures enriched for neuroblasts and glioblasts (early outgrowths) but deficient in melanoblasts were obtained by removing the neural tube 13 hours after explantation (Reedy et al., 1998). Melanoblast clusters were isolated from the dorsal neural tube 30 hours after explantation, as previously described (Loring et al., 1981).

For immunocytochemistry, neural crest cells were plated on glass coverslips coated with fibronectin or Fc fusion ligands (Davy and Robbins, 2000). Cells were then fixed in 4% PFA for 10 minutes at room temperature and permeabilised in 0.1% Triton X-100, 2% BSA in PBS. For staining of the actin cytoskeleton, cells were incubated for 30 minutes in rhodamine-conjugated phalloidin (Sigma) as recommended by the supplier. Focal adhesion proteins were detected with the VIN-11-5 anti-vinculin antibody (1:100; Sigma). Cy2-conjugated secondary antibody (1:100; Jackson ImmunoResearch) was used to detect the primary antibody.

### RT-PCR analysis

cDNAs were isolated from cultured neural crest cells by using a Cells-to-cDNA kit (Ambion). Lysis buffer was added to neural crest cultures and incubated for 5 minutes. DNase I was added to cell lysates and incubated for 30 minutes at 37°C followed by incubation for 5 minutes at 75°C to inactivate the DNase I activity. First-strand cDNA synthesis was primed with random decamers or oligo(dT) using MMLV-reverse transcriptase. The following primers (Operon) were used for PCR: EphB1, sense primer 5'-AGGGTGGGAAGAAGTGAGTG-3' and antisense primer 5'-TCATCAACCTGCCACCAAAG-3'; for EphB2, sense primer 5'-AGGGGAGTTTGGTGAGGTGT-3', and antisense primer 5'-CCCCTGCACGTAGTTCATA-3'; for EphB3, sense primer 5'-AGGAGAGTTTGGTGAGGTGTG-3' and antisense primer 5'-CTCGGTGCACGTAGTTCATC-3'; for GAPDH, sense primer 5'-GATGGGTGTCAACCATGAGAAA-3' and antisense primer 5'-ATCAAAGGTGGAAGAATGGCTG-3'. Amplification of cDNAs was performed using 25 cycles with denaturation at 95°C for 1 minute, annealing at 50°C for 1 minute, and extension at 72°C for 1 minute. Final amounts of reagents in the reaction were 1 µg/ml each primer, 10 mM dNTPs and 1.5 mM MgCl<sub>2</sub> in a final volume of 50 µl.

### Whole-mount in situ hybridisation

Antisense and sense EphB1, EphB2, EphB3, EphB5 and EphA4 probes were produced by linearization of plasmid (kind gifts from Dr Elena Pasquale, The Burnham Institute, La Jolla, CA) with appropriate restriction enzymes, followed by *in vitro* transcription with T7 RNA polymerase. *In situ* hybridisation was performed as previously described (Nieto et al., 1996), with the following modifications. White leghorn chicken embryos (California Golden Eggs, Sacramento) stages 14-23 (Hamburger and Hamilton, 1951) were collected in cold PBS and extraembryonic tissues were removed. Embryos were fixed in 4% paraformaldehyde in PBS and dehydrated in a graded series of PBT-methanol. Embryos were bleached with 6% hydrogen peroxide, rehydrated and treated with 5 µg/ml proteinase K for 15-30 minutes, depending on the embryonic stages. Hybridisation was carried out at 70°C in hybridisation buffer for 36 hours. An alkaline phosphatase-mediated color reaction was carried out using BM Purple (Boehringer Mannheim). Control hybridisation experiments using sense probes were performed for all the receptor genes and did not produce any specific signals (data not shown). Stained embryos were embedded in OCT. Frozen sections were stained with HNK-1 antibody to detect neural crest cells. Cy2-conjugated goat anti mouse IgG+IgM (Jackson ImmunoResearch) was used as a secondary antibody.

### Trunk explants

The trunks of stage-12 chick embryos were excised at the level of the

most posterior 6 somites, as previously described (Krull et al., 1995; Krull and Kulesa, 1998). When older embryos were employed, segments from the thoracic level, equivalent in length to the stage-12 pieces, were excised and cultured. Explants were preincubated in a solution of ephrin-B1-Fc (10 µg/ml) or control human Fc fusion proteins and grown for 24 to 36 hours on Millicell polycarbonate membranes (Millipore Corp., Bedford, MA) at 37°C in a 5% CO<sub>2</sub> tissue culture incubator. Explants were then fixed in 4% PFA and immunostained with the monoclonal HNK-1 antibody (supernatant prepared from the cell line obtained from ATCC) to determine the distribution of neural crest cells, and a secondary antibody conjugated to horseradish peroxidase (1:1000; Promega).

### Transfilter chemotaxis assay

Chemotaxis chambers (Chemicon), in which upper and lower wells were separated by an 8-µm pore-size polycarbonate membrane precoated on the bottom side with fibronectin, were used in the transfilter migration assays. Prior to their addition to the bottom well, purified Fc or ephrin-B1-Fc fusion proteins (10 µg/ml) were preclustered by incubation with 100 µg/ml of polyclonal goat anti-human IgG-Fc (Jackson) for 1 hour at room temperature in complete culture medium. The upper wells were filled with medium containing neural crest cells at a concentration of 2×10<sup>6</sup> cells/ml. Plates were incubated for 6 hours at 37°C in a 5% CO<sub>2</sub> incubator. After migration, cells were then scraped from the upper side of the filter membrane in order to visualize only those cells that had migrated through the filter. Migratory cells were stained (Quantitative Cell Migration Assay kit; Chemicon), solubilised and quantified by optical density (OD) measurements at 550 nm.

### Cell attachment assay

Microtiter plates were coated with fibronectin (10 µg/ml) alone, ephrin-B1-Fc or human-Fc fusion proteins (10 µg/ml) alone or in combination with fibronectin as described by Davy and Robbins (Davy and Robbins, 2000). Adhesion assays were performed essentially as described by Hertzler and McClay (Hertzler and McClay, 1999). Briefly, coated plates were treated with BSA (40 µg/ml) to block any nonspecific background binding. Each well received 2.5×10<sup>4</sup> to 1×10<sup>5</sup> cells resuspended in F12 culture medium containing 10% fetal calf serum. Plates were sealed and immediately spun at 500 rpm for 3 minutes to attach 100% of the cells to the substratum. After 5 minutes at 37°C, the plates were inverted and spun again to remove non-adhering cells. Bound cells were stained and quantified by OD measurements at 550 nm. Three independent experiments with all variables in triplicate were performed. Results of three representative experiments are shown.

## RESULTS

### Localisation of transmembrane ephrins along the dorsolateral pathway during early and late stages of neural crest cell migration

At the onset of migration at the trunk level, neural crest cells take one of two possible pathways. First, they are directed along a ventromedial route through the somite. Twenty-four hours later, neural crest cells emigrating from the neural tube invade the dorsolateral migratory pathway between the dermomyotome and overlying ectoderm (Erickson et al., 1992). Previous descriptions of ephrin distribution during the early stages of neural crest cell migration (stages 12-15) showed that *ephrin-B1* and *ephrin-B2* mRNA are distributed in the posterior half of the somitic sclerotome, which the neural crest cells avoid (Krull et al., 1997; Wang and Anderson, 1997). This experimental analysis revealed that ephrin-B

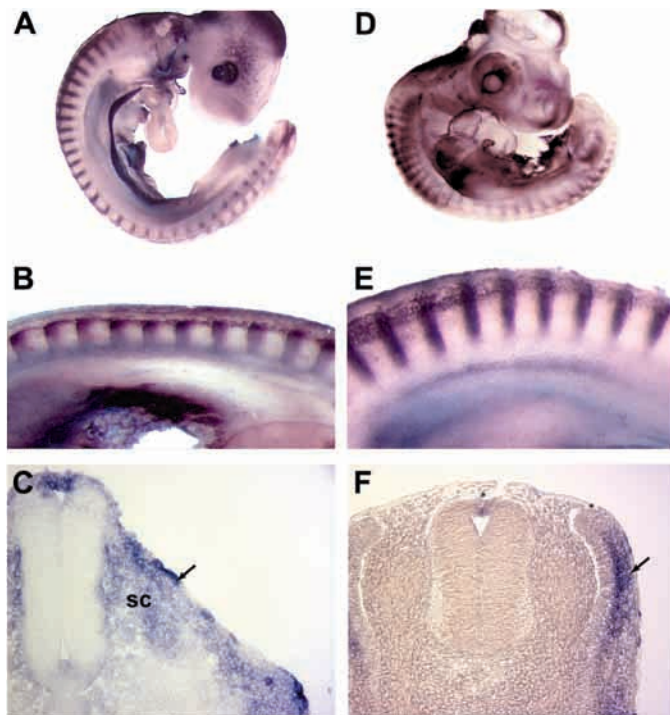

**Fig. 1.** Expression of ephrin-B proteins in chick embryos during early (A-C) and late (D-F) stages of neural crest cell migration. Whole-mount staining of stage-14 (A) and stage-23 (D) embryos with EphB2-Fc, visualized with anti-human Fc antibody coupled to alkaline phosphatase. Labelling revealed a similar pattern of expression in both developmental stages. Lateral views of the trunk region (B,E) show strong expression of ephrin-B ligands in the posterior half of the somites. Transverse sections of stage-14 and stage-23 embryos at midtrunk level show distribution of ephrin-B protein in the posterior sclerotome (C) (sc) and in the dorsolateral pathway (C,F) (arrows).

causes repulsion of neural crest cell movement, leading to the migration of the cells only through the anterior half of each somite. To assess the possibility that ephrin-B ligands control the timing of migration into the dorsolateral path, we determined the distribution of transmembrane ephrins by labelling whole chick embryos of stages 14-24 with Eph-Fc fusion proteins. At stage 14, when neural crest cells are migrating only in the ventral pathway, ephrins are expressed by the dermomyotome (Fig. 1C), in addition to the posterior half of each sclerotome (Fig. 1A,B), as described previously (Krull et al., 1997; Wang and Anderson, 1997). The distribution of ephrins in the dorsolateral space suggests that they may prevent the invasion of the early migrating crest into this pathway. At later stages, when melanoblasts begin migrating into the dorsolateral space (stages 19-20), ephrins continue to be expressed by the dermomyotome (Fig. 1F). Thus, unlike the ventrally migrating crest, melanoblasts do not avoid the dorsolateral space where ephrin-B ligands are expressed.

#### Detection of Eph receptors for transmembrane ephrins in explanted trunk neural crest cells

EphB3 expressed by early migratory neural crest cells binds to ephrin-B1 ligand to mediate a repulsive interaction that

**Fig. 2.** PCR shows EphB1, EphB2 and EphB3 receptors are expressed in early outgrowths and melanoblasts. EphB3 is highly expressed in both subpopulations of neural crest cells. GAPDH was used as an internal standard for PCR amplification.

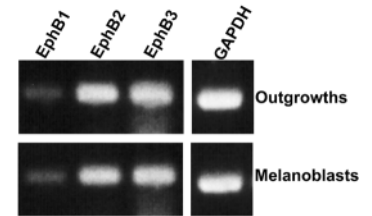

restricts the migration of the cells exclusively to the ventral pathway (Krull et al., 1997). The fact that ephrin-B proteins are still expressed in the dorsolateral pathway during melanoblast migration suggested that melanoblasts do not express EphB receptors and are therefore insensitive to the inhibitory signal. We used gene-specific RT-PCR to determine which EphB receptors are expressed by different subpopulations of neural crest cells (early outgrowths and melanoblasts). It has been reported previously that *EphB3* mRNA is present in early migratory cells (Krull et al., 1997). Our results indicate that *EphB1*, *EphB2* and *EphB3* mRNAs are expressed by early and late migratory neural crest cells (Fig. 2). The *EphB2* and *EphB3* transcripts are abundant in both early outgrowths and melanoblasts. The PCR primers do not reveal any isoforms as none of the amplified products overlap with any of the splice variant domains already identified for these receptors (Pasquale, 1991; Sajjadi and Pasquale, 1993; Connor and Pasquale, 1995).

#### Expression of Eph receptors during early and late stages of neural crest cell migration

We analysed Eph receptor expression during trunk neural crest cell migration by whole-mount in situ hybridisation. At stage 14, only *EphB3* is expressed in the ventral pathway. *EphB3* is present in the anterior half of the somites (Fig. 3), as has been previously demonstrated (Krull et al., 1997). Transverse sections through the trunk region show strong expression of *EphB3* in the sclerotome (Fig. 3A,B). *EphB3* expression is associated with a stream of neural crest cells (identified by HNK-1 staining) migrating into the sclerotome (Fig. 3C). *EphB3* is expressed weakly throughout the neural tube, as was previously reported (Baker et al., 2001). *EphB1*, *B2* and *B5* are expressed exclusively in the brain. No staining of the dorsal neural tube and somites is observed (Fig. 3). Results from RT-PCR indicate that early migratory cells also express *EphB1* and *B2* mRNAs but these receptors were not detected along the ventral pathway by in situ hybridisation (data not shown). It is possible that low levels of receptor are expressed by crest cells in situ that are below levels of detection. Strong expression of *EphB1* is found in rhombomeres 3 and 5 (Fig. 3). Expression of *EphB1* in the hindbrain has been documented in the mouse and chicken (Becker et al., 1994; Irving et al., 1996; Kury et al., 2000). *EphA4*, the only EphA class receptor that can also bind class B ephrins (Gale et al., 1996a; Gale et al., 1996b), is expressed in the hindbrain (r3 and r5), unsegmented paraxial mesoderm and the ventral edge of the dermomyotome (Fig. 3) (Hirano et al., 1998; Schmidt et al., 2000; Swartz et al., 2001). Transverse sections at the trunk level show strong expression of *EphA4* in the lateral plate mesoderm (Fig. 3D), but no expression is observed in the neural tube or somites. *EphA4* expression is not observed in

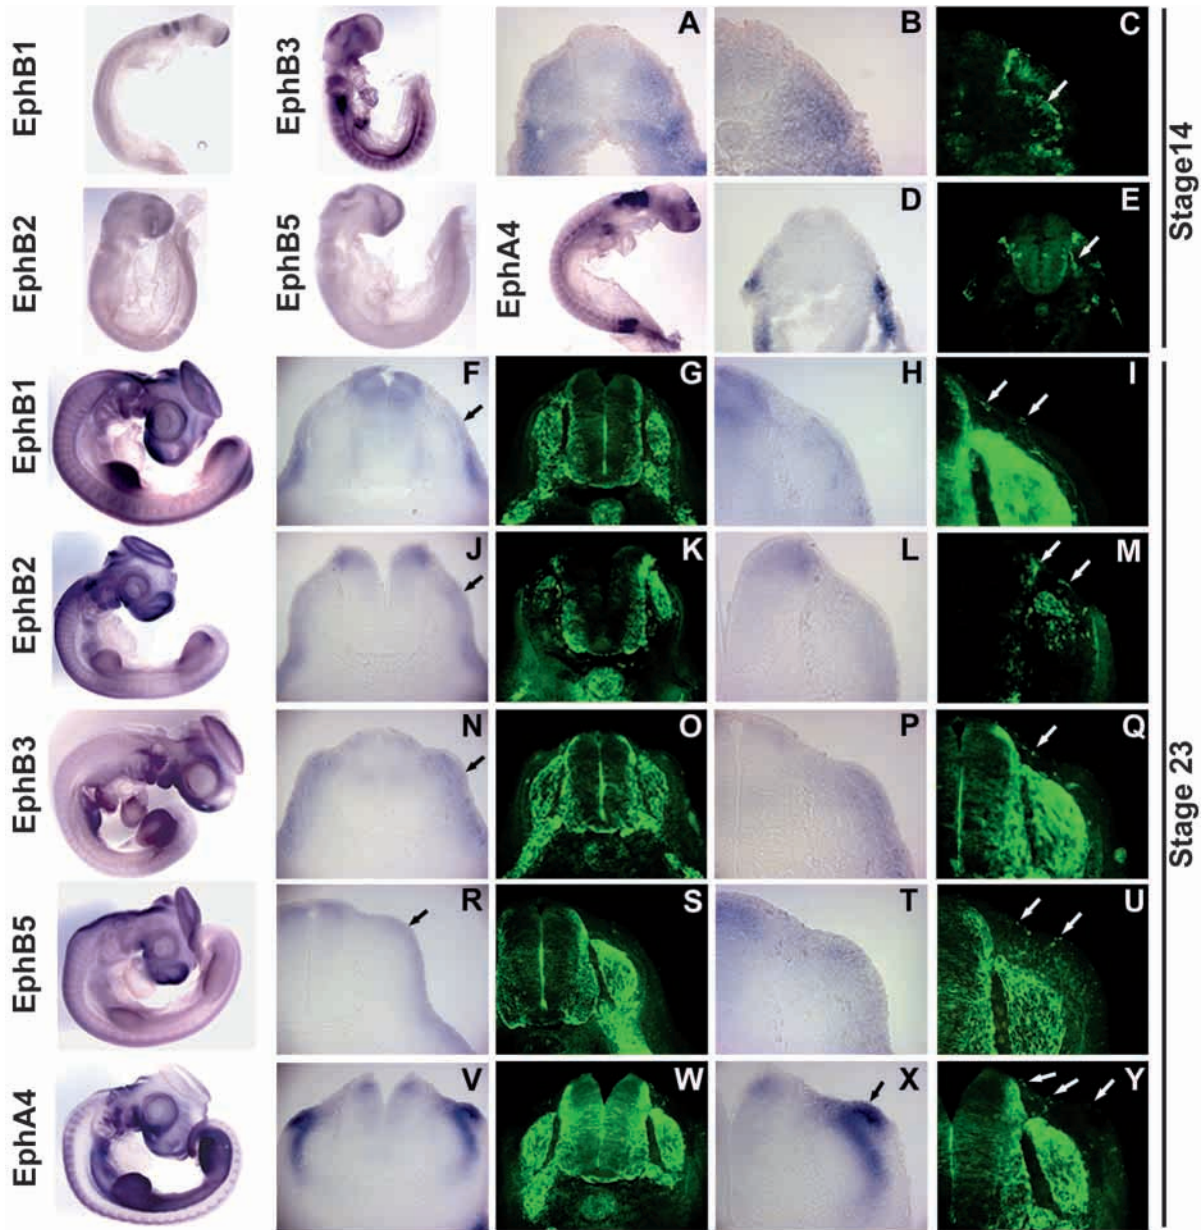

**Fig. 3.** Expression of *EphB1*, *EphB2*, *EphB3*, *EphB5* and *EphA4* in the developing chicken embryo. On the left are whole-mount in situ hybridisation on stage 14- and stage-23 embryos. (A-E) Transverse sections through the trunk region of a stage-14 embryo showing *EphB3* expression in the sclerotome (A,B), and *EphA4* expression in the unsegmented mesoderm and ventral edge of the dermomyotome (B). The transverse sections in B and D were also labelled with HNK-1 antibody showing neural crest cells in the ventral pathway (C,E, arrows). (F-Y) Transverse sections through the trunk region of stage-23 embryos showing *EphB1* (F,H), *EphB2* (J,L), *EphB3* (N,P), and *EphB5* (R,T) expression in the dorsal neural tube and dermomyotome (arrows), and *EphA4* (V,X) in the dorsal neural tube and dorsal edge of the dermomyotome (arrow). Transverse sections in F,J,N,R and V labelled were also labelled with HNK-1 antibody showing neural crest cells in the ventral pathway (G,K,O,S,W). Transverse sections in H,L,P,T and X were also stained to show melanoblasts migrating along the dorsolateral pathway (I,M,Q,U,Y, arrows).

regions corresponding to pathways taken by neural crest cells (Fig. 3E).

At later stages (stage 23), Eph receptors are widely expressed in the developing embryo. In whole mounts, mRNA transcripts are located primarily in the brain (Fig. 3). *EphB1*, *B2*, *B5* and *A4* are strongly expressed in the dorsal neural tube, whereas *EphB3* is expressed weakly. In the trunk, EphB receptors show moderate expression in the somites. *EphA4* is

also expressed as a stripe on the lateral edge of the somites (Fig. 3). Transverse sections confirm *EphB* mRNA expression in the dorsal neural tube and along the dorsolateral pathway during melanoblast migration (Fig. 3F-Y). In transverse sections, *EphA4* is expressed in the dorsal neural tube and the dorsal edge of the dermomyotome (Fig. 3V). Although multiple Eph receptors are expressed in the dorsal neural tube from which melanoblasts detach, these same receptors are

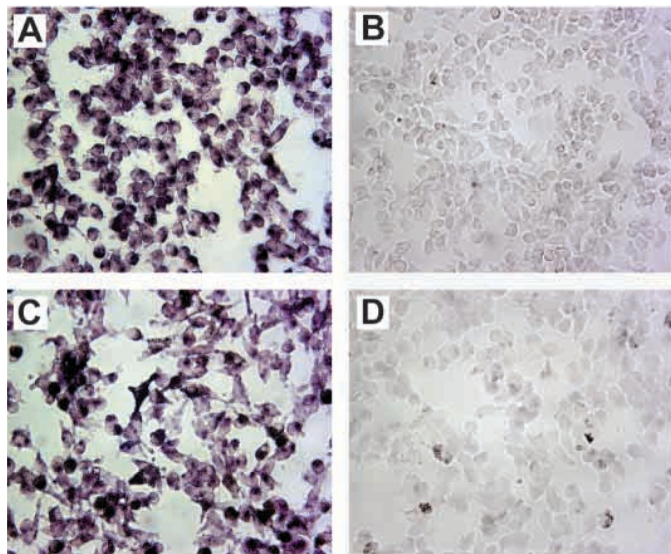

**Fig. 4.** Detection of EphB receptors in explanted trunk neural crest cells. Early outgrowths (A,B) and melanoblasts (C,D) were incubated with ephrin-B1-Fc (A,C) or Fc (B,D) proteins and visualized with anti-human Fc antibody coupled to alkaline phosphatase. Control cultures display no staining (B,D). Ephrin-B1-Fc bound to both early outgrowths (A) and melanoblasts (C), indicating that the receptor remains expressed *in vitro*.

expressed in the dermis through which the melanoblasts migrate. Therefore, in the *in situ* studies we could not unequivocally determine which Eph receptors are expressed by melanoblasts.

To confirm the presence of Eph receptor proteins for ephrin-B ligands in early outgrowths and melanoblasts, we labelled neural crest cultures with soluble ephrin-B1-Fc-tagged fusion proteins. Specific cell surface-labelling of melanoblasts by ligand-Fc, but not control Fc proteins, was detected (Fig. 4C,D). In agreement with a previous report (Krull et al., 1997), early outgrowths were also found to bind ephrin-B1-Fc, which indicates the expression of EphB receptors (Fig. 4A,B).

#### Embryonic explant experiments reveal a dual role for transmembrane ephrins in neural crest migration

To understand the nature of the interaction between the Eph receptors expressed by melanoblasts and the transmembrane ephrins found in the dorsolateral pathway, we disrupted the Eph-ephrin interactions by adding soluble ephrin-B1-Fc to chick trunk explants. The soluble ligand occupies the receptors *in vivo* without activating them and prevents the receptors on

**Table 1. Migration of early migratory neural crest cells in trunk explants treated with Ephrin-B1**

| Treatment    | Number of explants | Migration into the dorsolateral path* |
|--------------|--------------------|---------------------------------------|
| Fc (control) | 7                  | 1.14                                  |
| Ephrin-B1-Fc | 9                  | 24.6                                  |

\*Average numbers of cells in the dorsolateral pathway in whole explants treated with ephrin-B1-Fc or Fc alone. Cells were counted from transverse sections of whole trunk explants stained with HNK-1 antibody.

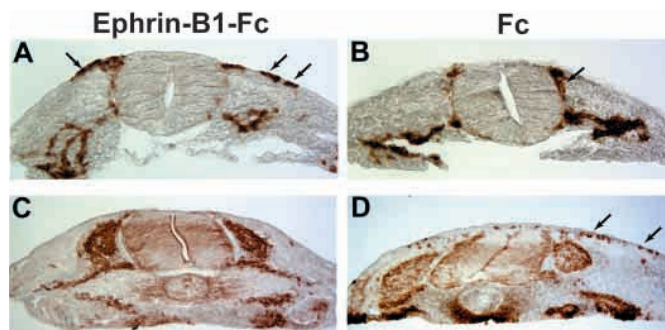

**Fig. 5.** Effect of ephrin-B1-Fc on the migration of neural crest cells into the dorsolateral pathway in whole-trunk explants. Ephrin-B1-Fc (A,C), or Fc alone (B,D) were added to stage-12 (A,B) and stage-18 (C,D) explants and the pattern of neural crest migration was visualized by anti-HNK-1 antibody staining. (A) Addition of soluble ephrin-B1-Fc to stage-12 trunk explants results in the inappropriate migration of neural crest cells (arrows) into the dorsolateral pathway. Control explants (B) show the typical pattern of neural crest cell migration through the ventral pathway (arrow). (C) Addition of soluble ephrin-B1-Fc at the onset of melanoblast migration (stage 18) results in the lack of cells in the dorsolateral pathway. Migration of melanoblasts (arrows) along the dorsolateral pathway is normal in control explants (D).

the neural crest cells from binding the endogenous form of the ligand (Krull et al., 1995; Krull et al., 1997; Koblar et al., 2000). Chick embryos were collected at stage 12, before neural crest cells start migrating through the somites, and at stage 18, immediately prior to melanoblast migration into the dorsolateral path. Whole trunk explants were excised and grown on Millicell inserts in the presence of ephrin-B1-Fc or Fc alone in culture medium.

Treatment of stage-12 explants with soluble ephrin-B1-Fc disrupts the segmental migration of neural crest cells, so that cells are found in both the anterior and posterior somite. Transverse sections confirmed the presence of cells in the anterior and posterior sclerotome (Krull et al., 1997). Neural crest cells were also found in the dorsolateral pathway, whereas in the controls, cells were only migrating ventromedially (Fig. 5A, B; Table 1). These results suggest that the early migratory neural crest cells are prevented from taking the dorsolateral pathway by the inhibitory action of the transmembrane ephrins present in this region. Conversely, when soluble ephrins are added at the onset of melanoblast migration in stage-18 explants, the migration of the cells into the dorsolateral path is inhibited (Fig. 5C; Table 2). In control explants, neural crest cells are observed in the dorsolateral pathway (Fig. 5D; Table

**Table 2. Migration of melanoblasts in trunk explants treated with Ephrin-B1**

| Treatment    | Number of explants | Migration into the dorsolateral path* |
|--------------|--------------------|---------------------------------------|
| Fc (control) | 6                  | 19                                    |
| Ephrin-B1-Fc | 6                  | 0.8                                   |

\*Average numbers of cells in the dorsolateral pathway in whole explants treated with ephrin-B1-Fc or Fc alone. Cells were counted from transverse sections of whole trunk explants stained with HNK-1 antibody.

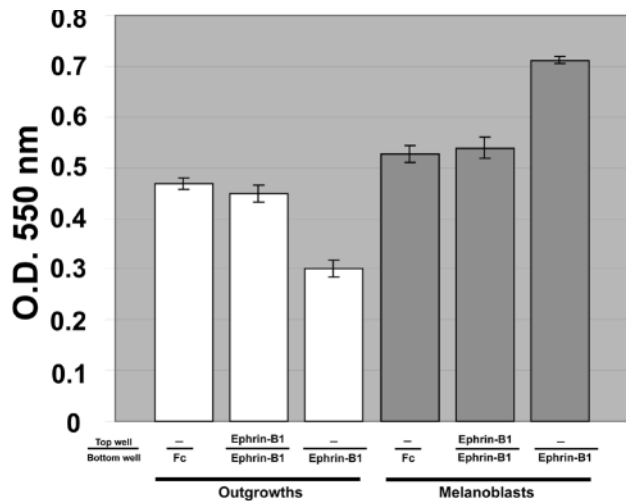

**Fig. 6.** Effects of soluble ephrin-B1-Fc on neural crest cell migration. Pre-clustered Fc or ephrin-B1-Fc (10  $\mu\text{g/ml}$ ) was added to the bottom well of a chemotaxis chamber and neural crest cells were added to the top well. In some control experiments preclustered ephrin-B1-Fc was also added to the upper well. Cells that migrated to the bottom side of the porous filter were stained, solubilised and quantified by OD measurements. Ephrin-B1-Fc induces a significant decrease of early migratory neural crest cell migration (white bars). In contrast, clustered ephrin-B1-Fc causes a significant increase in the transfilter migration of melanoblast cells (grey bars). This is a representative experiment and each data point is the mean  $\pm$  s.e.m. of triplicate wells ( $P < 0.05$ ).

2) in a pattern identical to what would be observed in an intact embryo. These latter results suggest that transmembrane ephrins promote the migration of melanoblasts into the dorsolateral pathway.

### Transmembrane ephrins promote melanoblast migration in vitro

The possible role of transmembrane ephrins as migration-promoting factors for melanoblasts was examined further using a transfilter chemotaxis assay. In this assay, preclustered ephrin-B1-Fc was added to the bottom well of a Boyden-like chamber. Neural crest cells were added to the upper well separated from the lower one by an 8- $\mu\text{m}$  polycarbonate filter, and allowed to migrate for 6 hours. The number of cells that migrated to the bottom side of the filter was then determined. The presence of ephrin-B1-Fc causes a statistically significant ( $P < 0.05$ ) reduction of migration of the early migratory neural crest cells. In contrast, ephrin-B1-Fc promotes the transfilter migration of melanoblasts (Fig. 6). These experiments were repeated three times and showed a statistically significant increase in melanoblast migration following ephrin-B1-Fc treatment, although the basal migration levels varied slightly from experiment to experiment.

### Surface-displayed ephrin-B1-Fc promotes melanoblast attachment to fibronectin

The above experiments showed that an interaction between the EphB receptors expressed by melanoblasts and the ephrin-B ligands does not result in a repulsive response. Instead, soluble ephrin-B ligands are chemoattractants for EphB-expressing melanoblast cells in vitro. Another possibility is that the Eph-

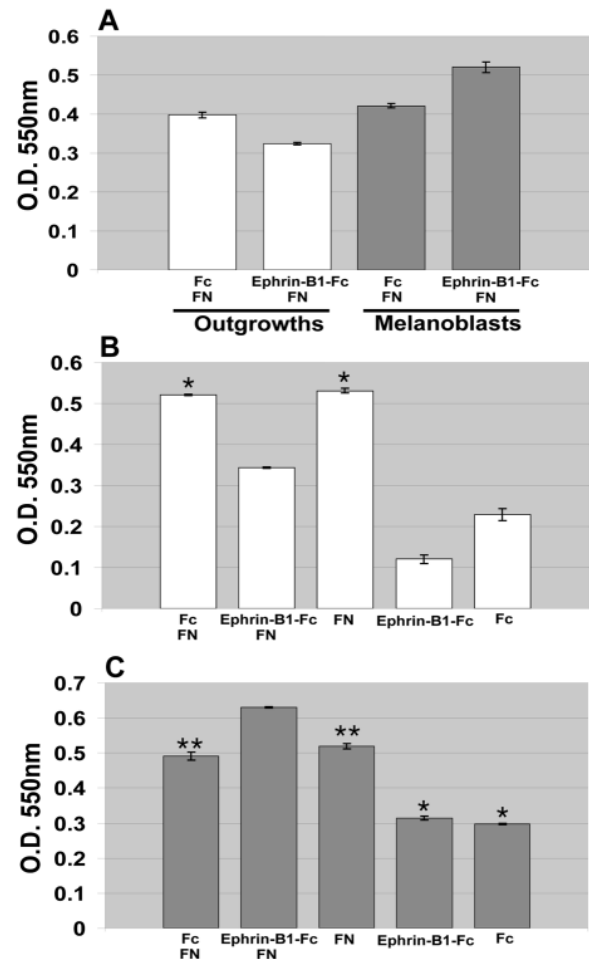

**Fig. 7.** Effects of ephrin-B1-Fc on neural crest cell adhesion to fibronectin. (A) Cells were plated on surfaces coated with fibronectin plus Fc (10  $\mu\text{g/ml}$ ) or fibronectin plus ephrin-B1-Fc (10  $\mu\text{g/ml}$ ), as described in Materials and Methods. Ephrin-B1-Fc significantly increases adhesion of melanoblasts to fibronectin (A,C), but decreases the attachment of early outgrowths to fibronectin (A,B). Asterisks represent no significant difference between values ( $P < 0.05$ ). Early outgrowths (B). Melanoblasts (C).

ephrin interaction may promote melanoblast migration by increasing cell adhesion. To test this hypothesis we investigated whether the engagement of transmembrane ephrins by Eph-B receptors increases adhesion of melanoblasts to the substratum. Cells were subjected to adhesion assays on plates to which ephrin-B1-Fc or a mixture of fibronectin and ephrin-B-Fc had been preadsorbed. Ephrin-B1-Fc promoted melanoblast attachment to fibronectin (Fig. 7A,C). In contrast, early migratory neural crest cells decreased their adhesion to fibronectin in the presence of ephrin-B1-Fc (Fig. 7A,B). These data are consistent with the results of the transwell chemotaxis assay, and suggest that transmembrane ephrins present in the dorsolateral pathway act as positive cues guiding the migration of melanoblasts.

### Ephrin-B ligand induces changes in neural crest cell morphology

Ephrins have been shown to induce rearrangements of the actin cytoskeleton, which results in growth cone collapse

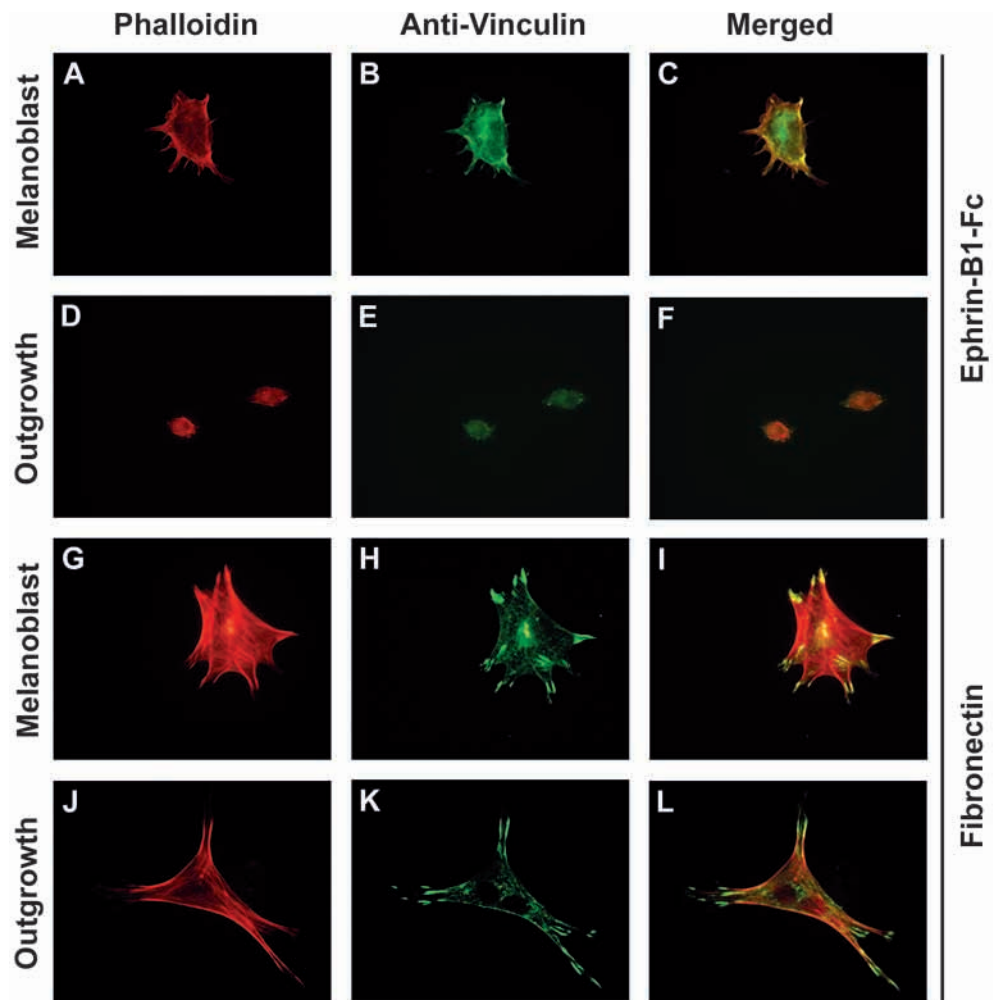

**Fig. 8.** Effects of ephrin-B1-Fc on neural crest cell morphology. Cells were plated on coverslips coated with ephrin-B1-Fc (10  $\mu\text{g/ml}$ ) or fibronectin (10  $\mu\text{g/ml}$ ). After 4 hours, cells were fixed and immunolabelled with rhodamine-conjugated phalloidin and anti-vinculin antibody. The figure shows cells representative of each treatment.

(Meima et al., 1997). Ephrin-B proteins also cause the collapse of early migratory neural crest filopodia (Krull et al., 1997). To examine the consequences of EphB-induced signalling on neural crest cell morphology, cells were plated on substrata consisting of fibronectin or ephrin-B1, and then stained with phalloidin to visualize the actin cytoskeleton. To determine the presence of focal adhesions, cells were stained with an anti-vinculin antibody. Early migrating neural crest cells and melanoblasts plated on fibronectin had a flattened morphology, exhibited well-developed actin stress fibers, and formed abundant focal contacts (Fig. 8G-L). Early migratory neural crest cells plated on ephrin-B1 developed a rounded morphology accompanied by disruption of the actin cytoskeleton. In addition, no defined localisation of vinculin was apparent in these cells, suggesting a loss of focal adhesions (Fig. 8D-F). In contrast, melanoblasts plated on ephrin-B1 were more irregular in shape and were characterized by the formation of numerous microspikes (Fig. 8A-C). These cells also formed fewer focal contacts, as evidenced by a diffuse staining of vinculin, although in some cells vinculin localized to the tips of actin microspikes (Fig. 8B,C). The change in morphology was quantified by determining the percentage of total melanoblast cells with more than three branched processes and the presence of microspikes. Of the cells plated on fibronectin, 4% bore

microspikes, whereas plating onto Ephrin-B-Fc resulted in 49% of the cells with microspikes.

## DISCUSSION

Previous studies revealed that early migrating neural crest cells, which will differentiate into neurons and glial cells, are inhibited from migrating into the dorsolateral path. Conversely, later migrating neural crest cells are already specified as melanoblasts, and these are the only neural crest cells capable of invading the dorsolateral path. In this study, we show that ephrin-B ligands produced by the dermomyotome prevent early migrating neural crest cells from taking this path, whereas later in development ephrin-B ligands promote the migration of melanoblasts into the dorsolateral path. Ephrin-B proteins enhance melanoblast adhesion to fibronectin and stimulate the production of actin-filled microspikes, suggesting that ephrins promote melanoblast migration by an adhesive mechanism.

### Ephrin-B ligands prevent early migratory neural crest cells from invading the dorsolateral pathway

The ephrin-B family of transmembrane ligands has been implicated in the segmental guidance of chick trunk neural



crest cells through the somites. These ligands are expressed in regions that early migratory neural crest cells avoid, such as the posterior half of the sclerotome (Krull et al., 1997; Wang and Anderson, 1997). We show that ephrin-B ligands are also present in the dorsolateral pathway when neural crest cells are migrating ventrally, and both *in vitro* and *in vivo* assays suggest that they prevent early migratory neural crest cells from invading the dorsolateral path. First, transfilter assays confirm that transmembrane ephrins can act as cell repellants for early migratory neural crest cells, and reduce adhesion to the substratum in an adhesion assay. Conversely, addition of soluble ephrin-B to chick trunk explants results in the inappropriate migration of early neural crest cells into the dorsolateral pathway. Together these results show that ephrin-B produced by the dermomyotome acts as a repulsive cue for early migratory crest, and blocks their migration into the dorsolateral pathway.

Ephrins are unlikely to act by themselves as other molecules that have been demonstrated to inhibit neural crest cell migration *in vitro* are distributed in the dorsolateral pathway. Specifically, PNA-binding proteins and chondroitin sulphate proteoglycan expression patterns in the chick trunk suggest a barrier function (Oakley et al., 1994; Pettway et al., 1996). F-spondin is an extracellular matrix molecule that is also produced by barrier tissues. Consistent with an inhibitory role for this protein, blocking F-spondin activity using function-blocking antibodies also results in the inappropriate migration of early neural crest cells into the dorsolateral pathway (Debby-Brafman et al., 1999). Semaphorins are molecules whose inhibitory activity *in vitro* has also been suggested to restrict migration of neural crest cells to the anterior somite (Eickholt et al., 1999). They are promising candidates for blocking the dorsolateral pathway as well, since they are expressed along this path during the early stages of neural crest cell migration (our unpublished results). It is likely that ephrin-B ligands operate in concert with these molecules to prevent early migratory cells from invading the dorsolateral pathway.

### **Ephrin-B ligands promote the migration of melanoblasts**

In this report we show that ephrin-B expression is not downregulated when neural crest cells advance through the dorsolateral path (see also Koblar et al., 2000). Furthermore, previous studies show that when clusters of melanoblasts are placed into a young chick embryo at the time when neural crest cells are only migrating ventrally, the grafted cells invade the dorsolateral pathway precociously (Erickson and Goins, 1995), which we know is filled with ephrins. In the chick, ephrin-B1 remains expressed in the posterior half of the somite and along the dermomyotome at late stages of neural crest cell migration (Koblar et al., 2000). In addition, melanoblasts express several EphB receptors, including EphB3, which are also expressed by early migratory cells and are known to mediate a repulsive response that restricts early migratory neural crest cells to the anterior somite. These observations are not consistent with melanoblast migration being inhibited by ephrins, and instead suggest the ephrin-B ligands expressed in the dorsolateral path positively regulate melanoblast migration. Three independent assays were used to investigate this possibility.

Embryonic explants have been very useful in studies of cell migration and axon guidance (Krull and Kulesa, 1998). We

disrupted the Eph/ephrin signalling by adding soluble ligand to trunk explants. Blocking receptor activation has a significant effect on the migration of melanoblast cells, as these cells are no longer found migrating on the dorsolateral pathway. This is direct evidence that ephrin-B promotes neural crest cell migration into the dorsolateral pathway.

To further substantiate this conclusion, we used a chemotaxis assay in which addition of soluble ephrin-B ligand inhibits the migration of early migratory cells as expected, but promotes the transfilter migration of melanoblasts. Ephrin-A1 has been shown to be a chemoattractant for endothelial cells (Pandey et al., 1995). Given that ephrins are cell-surface-associated molecules, it is not certain that there is a soluble form of ephrin in the embryo to generate a chemotactic gradient. However, a recent study by Hattori and colleagues (Hattori et al., 2000) demonstrated that ADAM-10 metalloprotease cleaves ephrin-A2 to generate a soluble form of this ligand. The *in vivo* proteolytic processing of these ephrins by ADAMs would result in the release of ligand fragments that may form a chemotactic gradient. Consistent with this, data from our lab shows that ADAM10 is highly expressed along the dorsolateral pathway during melanoblast migration (R. J. Hall and C. A. Erikson, personal communication). Studies are underway to determine the role of this metalloprotease in the regulation of neural crest cell migration.

Our data demonstrate that ephrin-B, as a soluble protein, is a chemotactic signal for melanoblasts, but does not rule out the possibility that neural crest cells migrating along the dorsolateral pathway are responding to an adhesive substratum of membrane-bound ephrin-B. Consistent with this, we show that engagement of EphB receptors by substratum-adsorbed ephrin-B ligands promotes melanoblast attachment to fibronectin. Signal transduction pathways downstream of the EphB receptors may lead to an increase in cell adhesion by modulating integrin affinity and/or interactions between integrins and intracellular proteins that are required for adhesion. Previous studies show that ephrin-A ligands can modulate integrin function leading to an increase adhesion of fibroblasts to fibronectin (Davy and Robbins, 2000). Also, ephrin-B ligands have been reported to promote endothelial cell attachment to extracellular matrix components through  $\alpha_v\beta_3$  and  $\alpha_5\beta_1$  integrins (Huynh-Do et al., 1999). Neural crest cells express several fibronectin receptors, including  $\alpha_v\beta_3$  and  $\alpha_5\beta_1$  (Testaz et al., 1999). In our study, these integrins could be involved in the increased adhesion via EphB engagement. Other molecules, such as F-spondin, PNA-binding glycoproteins and chondroitin sulphate glycoconjugates, are also expressed in the dermomyotome and display inhibitory effects *in vitro* (Davies et al., 1990; Debby-Brafman et al., 1991; Oakley et al., 1994). Guidance of melanoblasts along the dorsolateral pathway might therefore result from a composite of the effects of repellent and attractant signals. Subtle differences in the concentration of these molecules would be instrumental in creating specific substratum conditions favouring the migration of melanoblasts into the dorsolateral pathway.

There are several examples in other systems where ephrins have been implicated in cell adhesion events. In the retinectal system, EphB2 and ephrin-B1 are expressed in dorsoventral gradients in a manner inconsistent with a role in repulsion; axons from the ventral retina express EphB2 and project to the

dorsal tectum, which expresses high levels of ephrin-B1 protein (Holash and Pasquale, 1995; Braisted et al., 1997). Furthermore, *EphB2/EphB3* double-mutant mice display cleft palate (Orioli et al., 1996) and neural folds fail to adhere in the dorsal midline in *ephrin-A5* null mice (Holmberg et al., 2000), suggesting involvement of these molecules in cell-cell adhesion. Finally, activation of certain Eph receptors can promote cell-cell adhesion, and adhesion to a substratum in myeloid cells (Bohme et al., 1996) and retinal cells (Holash et al., 1997), respectively. Similarly, activation of EphB receptors in endothelial cells with clustered soluble ephrin-B upregulates cell adhesion, which triggers assembly of endothelial cells in culture to form a capillary network (Stein et al., 1998; Adams et al., 1999).

The binding of early migratory cells to ephrin-B results in cell rounding, substantial reduction of stress fibers and a nearly complete loss of vinculin localisation, suggesting a loss of focal adhesions. In contrast, binding of melanoblasts to ephrin-B results in the reorganization of the actin cytoskeleton, notably the generation of numerous F-actin-containing microspikes, which terminate in small focal contacts. Microspikes are structures usually found at the leading edge of migratory fibroblasts, epithelial cells and neuronal growth cones, where they are actively involved in cell migration (Adams, 1997; Fischer et al., 1997; Yamashiro et al., 1998). The small focal adhesions present in microspikes formed in melanoblasts upon contact with ephrin-B could be important in promoting adhesion to extracellular matrix proteins such as fibronectin and providing the traction force necessary to direct cells along the dorsolateral pathway. This is in agreement with the observation that nascent (small) focal contacts in extending lamellipodia generate strong forces responsible for driving cell migration (Beningo et al., 2001).

### Ephrins in neural crest cell guidance

To our knowledge, this is the first report of transmembrane ephrins promoting neural crest cell migration. Furthermore, the results presented here show that ephrin-B ligands act as bifunctional guidance cues. They first prevent early migratory neural cells from invading the dorsolateral path, and then later stimulate the migration of melanoblasts into this pathway. A related situation occurs in cortical neurons that project through different layers of the cerebral cortex. Here, *ephrin-A5* repels neurons from layers 2/3 and 5 of the cortex, but induces sprouting of axons from deeper layers (Castellani et al., 1998).

The mechanism by which Eph receptors and ephrins trigger different cellular responses in the neural crest cells is not known. Presumably one important downstream signalling target is the cytoskeleton, since the ephrin-B ligand induces the formation of actin microspikes in melanoblasts and not in the early migratory crest. The formation of microspikes is regulated by the activation of Rac/Rho/Cdc42 family of small GTPases (Hall, 1998; Nobes and Hall, 1998), and therefore it seems likely that the activation of the Eph receptor acts downstream on these small GTPases in melanoblasts. Indeed, Ephexin, a guanine nucleotide exchange factor (GEF), and several SH2-domain-containing proteins such as Src, Nck, and RasGAP, which bind activated Eph receptors, are components of signal transduction pathways that control the polymerization of the actin cytoskeleton via the Rac/Rho/Cdc42 family of GTPases (Bruckner and Klein, 1998; Holland et al., 1998;

Shamah et al., 2001). Why the two signalling pathways diverge functionally in melanoblasts and the early migratory neural crest is unknown. One possibility is that they may be regulated by interactions with different Eph receptors and/or coreceptors, resulting in the assembly of receptor complexes with different signalling properties. Consistent with this, the EphB3/ephrin-B1 receptor-ligand complex appears to be responsible for the repulsive response that restricts neural crest cell entry into the posterior half-sclerotome. At later stages of development, ephrin-B1 produced by the dermomyotome (Koblar et al., 2000), may form a complex with EphB3 and/or other EphB receptors. Even though by *in situ* hybridisation Eph receptor expression is seen in the dorsal neural tube and in regions corresponding to the pathway taken by melanoblasts, we could not confirm that HNK-1-positive cells express multiple Eph receptors *in situ*. Interestingly, the formation of hetero-receptor complexes between members of the EphB family upon ephrin-B1 stimulation has recently been described (Freywald et al., 2002).

Variation in receptor structure may also underlie differences in function. In favour of this, a truncated isoform of EphA7 can block the repulsive interaction mediated by full-length EphA7, shifting the cellular response from repulsion to adhesion (Holmberg et al., 2000). Different isoforms encoded by alternatively spliced mRNAs have also been identified for several EphB receptors. For example, a variant form of EphB3 with a juxtamembrane insertion of 15 amino acids has been isolated (Sajjadi and Pasquale, 1993). Different isoforms of EphB2 are transcribed in the chicken: a truncated form lacking the kinase domain and a form that has an insertion of 16 amino acids in the juxtamembrane region (Sajjadi and Pasquale, 1993; Connor and Pasquale, 1995). It is not known whether neural crest cells express any of these variants. We are presently investigating what modulates the nature of the distinct cellular responses observed between these subpopulations of neural crest cells.

We are grateful to Nicholas Gale for the kind gift of Fc-fusion proteins and Elena Pasquale for kindly providing the Eph receptor clones. We also thank Cathy Krull for expert assistance in the trunk explant assay, helpful discussions and comments on this manuscript. We thank Richard Tucker, Peter Armstrong, Nicholas Gale and Dave McClay for critical reading of the manuscript. This research was supported by a grant from the NIH (GM53258) to C. A. E.

### REFERENCES

- Adams, J. C. (1997). Characterization of cell-matrix adhesion requirements for the formation of fascin microspikes. *Mol. Biol. Cell* **8**, 2345-2363.
- Adams, R. H., Wilkinson, G. A., Weiss, C., Diella, F., Gale, N. W., Deutsch, U., Risau, W. and Klein, R. (1999). Roles of ephrinB ligands and EphB receptors in cardiovascular development: demarcation of arterial/venous domains, vascular morphogenesis, and sprouting angiogenesis. *Genes Dev.* **13**, 295-306.
- Baker, R. K., Vanderboom, A. K., Bell, G. W. and Antin, P. B. (2001). Expression of the receptor tyrosine kinase gene EphB3 during early stages of chick embryo development. *Mech. Dev.* **104**, 129-132.
- Becker, N., Seitanidou, T., Murphy, P., Mattei, M. G., Topilko, P., Nieto, M. A., Wilkinson, D. G., Charnay, P. and Gilardi-Hebenstreit, P. (1994). Several receptor tyrosine kinase genes of the Eph family are segmentally expressed in the developing hindbrain. *Mech. Dev.* **47**, 3-17.
- Beningo, K. A., Dembo, M., Kaverina, I., Small, J. V. and Wang, Y. L. (2001). Nascent focal adhesions are responsible for the generation of strong propulsive forces in migrating fibroblasts. *J. Cell Biol.* **153**, 881-888.

- Bohme, B., VandenBos, T., Cerretti, D. P., Park, L. S., Holtrich, U., Rubsamens-Waigmann, H. and Strebhardt, K. (1996). Cell-cell adhesion mediated by binding of membrane-anchored ligand LERK-2 to the EPH-related receptor human embryonal kinase 2 promotes tyrosine kinase activity. *J. Biol. Chem.* **271**, 24747-24752.
- Braisted, J. E., McLaughlin, T., Wang, H. U., Friedman, G. C., Anderson, D. J. and O'Leary, D. D. (1997). Graded and lamina-specific distributions of ligands of EphB receptor tyrosine kinases in the developing retinotectal system. *Dev. Biol.* **191**, 14-28.
- Bronner-Fraser, M. (1986). Analysis of the early stages of trunk neural crest migration in avian embryos using monoclonal antibody HNK-1. *Dev. Biol.* **115**, 44-55.
- Bruckner, K. and Klein, R. (1998). Signaling by Eph receptors and their ephrin ligands. *Curr. Opin. Neurobiol.* **8**, 375-382.
- Castellani, V., Yue, Y., Gao, P. P., Zhou, R. and Bolz, J. (1998). Dual action of a ligand of Eph receptor tyrosine kinases on specific populations of axons during the development of cortical circuits. *J. Neurosci.* **18**, 4663-4672.
- Connor, R. J. and Pasquale, E. B. (1995). Genomic organization and alternatively processed forms of Cek5, a receptor protein-tyrosine kinase of the Eph subfamily. *Oncogene* **11**, 2429-2438.
- Davies, R. J., Cook, G. M. W., Stern, C. D. and Keynes, R. J. (1990). Isolation from chick somites of a glycoprotein fraction that causes collapse of dorsal root ganglion growth cones. *Neuron* **4**, 11-20.
- Davy, A. and Robbins, S. M. (2000). Ephrin-A5 modulates cell adhesion and morphology in an integrin-dependent manner. *EMBO J.* **19**, 5396-5405.
- Debby-Brafman, A., Burstyn-Cohen, T., Klar, A. and Kalcheim, C. (1999). F-Spondin, expressed in somite regions avoided by neural crest cells, mediates inhibition of distinct somite domains to neural crest migration. *Neuron* **22**, 475-488.
- Dottori, M., Hartley, L., Galea, M., Paxinos, G., Polizzotto, M., Kilpatrick, T., Bartlett, P. F., Murphy, M., Kontgen, F. and Boyd, A. W. (1998). EphA4 (Sek1) receptor tyrosine kinase is required for the development of the corticospinal tract. *Proc. Natl. Acad. Sci. USA* **95**, 13248-13253.
- Dresher, U., Kremoser, C., Handwerker, C., Loshinger, J., Noda, M. and Bonhoeffer, F. (1995). In vitro guidance of retinal ganglion cell axons by RAGS, a 25 kDa tectal protein related to ligands for Eph receptor tyrosine kinases. *Cell* **82**, 359-370.
- Eickholt, B. J., Mackenzie, S. L., Graham, A., Walsh, F. S. and Doherty, P. (1999). Evidence for collapsin-1 functioning in the control of neural crest migration in both trunk and hindbrain regions. *Development* **126**, 2181-2189.
- Erickson, C. A., Duong, T. D. and Tosney, K. W. (1992). Descriptive and experimental analysis of the dispersion of neural crest cells along the dorsolateral path and their entry into ectoderm in the chick embryo. *Dev. Biol.* **151**, 251-272.
- Erickson, C. A. and Goins, T. L. (1995). Avian neural crest cells can migrate in the dorsolateral path only if they are specified as melanocytes. *Development* **121**, 915-924.
- Fischer, D., Tucker, R. P., Chiquet-Ehrismann, R. and Adams, J. C. (1997). Cell-adhesive responses to tenascin-C splice variants involve formation of fascin microspikes. *Mol. Biol. Cell* **8**, 2055-2075.
- Freywald, A., Sharfe, N. and Roifman, C. M. (2002). The kinase-null EphB6 receptor undergoes transphosphorylation in a complex with EphB1. *J. Biol. Chem.* **277**, 3823-3828.
- Gale, N. W., Holland, S. J., Valenzuela, D. M., Flenniken, A., Pan, L., Ryan, T. E., Henkemeyer, M., Strebhardt, K., Hirai, H., Wilkinson, D. G., Pawson, T., Davis, S. and Yancopoulos, G. D. (1996a). Eph receptors and ligands comprise two major specificity subclasses and are reciprocally compartmentalized during embryogenesis. *Neuron* **17**, 9-19.
- Gale, N. W., Flenniken, A. M., Wang, H., Compton, D. C., Jenkins, N., Davis, S., Anderson, D. J., Wilkinson, D. G. and Yancopoulos, G. D. (1996b). Elk-L3, a novel transmembrane ligand for the Eph family of receptor tyrosine kinases, expressed in embryonic floor plate, roof plate and hindbrain segments. *Oncogene* **13**, 1343-1352.
- Hall, A. (1998). Rho GTPases and the actin cytoskeleton. *Science* **279**, 509-514.
- Hamburger, V. and Hamilton, H. L. (1951). A series of normal stages in development of the chick embryo. *J. Morphol.* **88**, 49-92.
- Hattori, M., Osterfield, M. and Flanagan, J. G. (2000). Regulated cleavage of a contact-mediated axon repellent. *Science* **289**, 1360-1365.
- Helmbacher, F., Schneider-Mannoury, S., Topilko, P., Turet, L. and Charnay, P. (2000). Targeting of the EphA4 tyrosine kinase receptor affects dorsal/ventral pathfinding of limb motor axons. *Development* **127**, 3313-3324.
- Henkemeyer, M., Marengere, L. E., McGlade, J., Olivier, J. P., Conlon, R. A., Holmyard, D. P., Letwin, K. and Pawson, T. (1994). Immunolocalisation of the Nuk receptor tyrosine kinase suggests roles in segmental patterning of the brain and axonogenesis. *Oncogene* **9**, 1001-1014.
- Hertzler, P. L. and McClay, D. R. (1999). Alpha SU2, an epithelial integrin that binds laminin in the sea urchin embryo. *Dev. Biol.* **207**, 1-13.
- Hirano, S., Tanaka, H., Ohta, K., Norita, M., Hoshino, K., Meguro, R. and Kase, M. (1998). Normal ontogenic observations on the expression of Eph receptor tyrosine kinase, Cek8, in chick embryos. *Anat. Embryol.* **197**, 187-197.
- Holash, J. A. and Pasquale, E. B. (1995). Polarized expression of the receptor protein tyrosine kinase Cek5 in the developing avian visual system. *Dev. Biol.* **172**, 683-693.
- Holash, J. A., Soans, C., Chong, L. D., Shao, H., Dixit, V. M. and Pasquale, E. B. (1997). Reciprocal expression of the Eph receptor Cek5 and its ligand(s) in the early retina. *Dev. Biol.* **182**, 256-269.
- Holland, S. J., Peles, E., Pawson, T. and Schlessinger, J. (1998). Cell-contact-dependent signalling in axon growth and guidance: Eph receptor tyrosine kinases and receptor protein tyrosine phosphatase B. *Curr. Opin. Neurobiol.* **8**, 117-127.
- Holmberg, J., Clarke, D. L. and Frisen, J. (2000). Regulation of repulsion versus adhesion by different splice forms of an Eph receptor. *Nature* **408**, 203-206.
- Huynh-Do, U., Stein, E., Lane, A. A., Liu, H., Cerretti, D. P. and Daniel, T. O. (1999). Surface densities of ephrin-B1 determine EphB1-coupled activation of cell attachment through  $\alpha_v\beta_3$  and  $\alpha_5\beta_1$  integrins. *EMBO J.* **18**, 2165-2173.
- Imondi, R., Wideman, C. and Kaprielian, Z. (2000). Complementary expression of transmembrane ephrins and their receptors in the mouse spinal cord: a possible role in constraining the orientation of longitudinally projecting axons. *Development* **127**, 1397-1410.
- Irving, C., Nieto, M. A., DasGupta, R., Charnay, P. and Wilkinson, D. G. (1996). Progressive spatial restriction of Sek-1 and Krox-20 gene expression during hindbrain segmentation. *Dev. Biol.* **173**, 26-38.
- Kitamura, K., Takiguchi-Hayashi, K., Sezaki, M., Yamamoto, H. and Takeuchi, T. (1992). Avian neural crest cells express a melanogenic trait during early migration from the neural tube: observations with the new monoclonal antibody, 'MEBL-1'. *Development* **114**, 367-378.
- Koblar, S. A., Krull, C. E., Pasquale, E. B., McLennan, R., Peale, F. D., Cerretti, D. P. and Bothwell, M. (2000). Spinal motor axons and neural crest cells use different molecular guides for segmental migration through the rostral half-somite. *J. Neurobiol.* **42**, 437-447.
- Krull, C. E., Collazo, A., Fraser, S. E. and Bronner-Fraser, M. (1995). Segmental migration of trunk neural crest: time-lapse analysis reveals a role for PNA-binding molecules. *Development* **121**, 3733-3743.
- Krull, C. E., Lansford, R., Gale, N. W., Collazo, A., Marcelle, C., Yancopoulos, G. D., Fraser, S. E. and Bronner-Fraser, M. (1997). Interactions of Eph-related receptors and ligands confer rostrocaudal pattern to trunk neural crest migration. *Curr. Biol.* **8**, 571-180.
- Krull, C. E. and Kulesa, P. M. (1998). Embryonic explant and slice preparations for studies of cell migration and axon guidance. *Curr. Top. Dev. Biol.* **36**, 145-159.
- Kury, P., Gale, N., Connor, R., Pasquale, E. and Guthrie, S. (2000). Eph receptors and ephrin expression in cranial motor neurons and the branchial arches of the chick embryo. *Mol. Cell. Neurosci.* **15**, 123-140.
- Le Douarin, N. M. and Kalcheim, C. (1999). *The Neural Crest*. Cambridge, UK: Cambridge University Press.
- Loring, J., Glimelius, B., Erickson, C. A. and Weston, J. A. (1981). Analysis of developmentally homogeneous neural crest cell populations in vitro. I. Formation, morphology and differentiative behavior. *Dev. Biol.* **82**, 86-94.
- Loring, J. F. and Erickson, C. A. (1987). Neural crest cell migratory pathways in the trunk of the chick embryo. *Dev. Biol.* **121**, 220-236.
- Meima, L., Kljavin, I. J., Moran, P., Shih, A., Winslow, J. W. and Caras, I. W. (1997). AL-1-induced growth cone collapse of rat cortical neurons is correlated with REK7 expression and rearrangement of the actin cytoskeleton. *Eur. J. Neurosci.* **9**, 177-188.
- Nakamoto, M., Cheng, H.-J., Friedman, G. C., McLaughlin, T., Hansen, M. J., Yoon, C. H., O'Leary, D. D. M. and Flanagan, J. G. (1996). Topographically specific effects of Elf-1 on retinal axon guidance in vitro and retinal axon mapping in vivo. *Cell* **86**, 755-766.
- Nieto, M. A., Patel, K. and Wilkinson, D. G. (1996). In situ hybridisation analysis of chick embryos in whole mount and tissue sections. *Methods Cell Biol.* **51**, 219-235.

- Nobes, C. D. and Hall, A.** (1999). Rho GTPases control polarity, protrusion, and adhesion during cell movement. *J. Cell Biol.* **144**, 1235-1244.
- Oakley, R. A., Lasky, C. J., Erickson, C. A. and Tosney, K. W.** (1994). Glycoconjugates mark a transient barrier to neural crest migration in the chicken embryo. *Development* **120**, 103-114.
- Orioli, D., Henkemeyer, M., Lemke, G., Klein, R. and Pawson, T.** (1996). Sek4 and Nuk receptors cooperate in guidance of commissural axons and in palate formation. *EMBO J.* **15**, 6035-6049.
- Pandey, A., Shao, H., Marks, R. M., Polverini, P. J. and Dixit, V. M.** (1995). Role of B61, the ligand for the Eck receptor tyrosine kinase, in TNF-alpha-induced angiogenesis. *Science* **268**, 567-569.
- Park, S., Frisen, J. and Barbacid, M.** (1997). Aberrant axonal projections in mice lacking EphA8 (Eek) tyrosine protein kinase receptors. *EMBO J.* **16**, 3106-3114.
- Pasquale, E. B.** (1991). Identification of chicken embryo kinase 5, a developmentally regulated receptor-type tyrosine kinase of the Eph family. *Cell Regul.* **2**, 523-534.
- Pettway, Z., Domowicz, M., Schwartz, N. B. and Bronner-Fraser M.** (1996). Age-dependent inhibition of neural crest migration by the notochord correlates with alterations in the S103L chondroitin sulfate proteoglycan. *Exp. Cell. Res.* **225**, 195-206.
- Reedy, M. V., Faraco, C. D. and Erickson, C. A.** (1998). The delayed entry of thoracic neural crest cells into the dorsolateral path is a consequence of the late emigration of melanogenic neural crest cells from the neural tube. *Dev. Biol.* **200**, 234-246.
- Rickmann, M., Fawcett, J. W. and Keynes, R. J.** (1985). The migration of neural crest cells and the growth of motor axons through the rostral half of the chick somite. *J. Embryol. Exp. Morphol.* **90**, 437-455.
- Sajjadi, F. G. and Pasquale, E. B.** (1993). Five novel avian Eph-related tyrosine kinases are differentially expressed. *Oncogene* **8**, 1807-1813.
- Schmidt, C., Christ, B., Maden, M., Brand-Saberi, B. and Patel, K.** (2001). Regulation of EphA4 expression in paraxial and lateral plate mesoderm by ectoderm-derived signals. *Dev. Dyn.* **220**, 377-386.
- Serbedzija, G. N., Bronner-Fraser, M. and Fraser, S. E.** (1989). A vital dye analysis of the timing and pathways of avian trunk neural crest cell migration. *Development.* **106**, 809-816.
- Shamah, S., Lin, M., Goldberg, J., Estrach, S., Sahin, M., Hu, L., Bazalakova, M., Neve, R., Corfas, G., Debant, A. and Greenberg, M.** (2001). EphA receptors regulate growth cone dynamics through the novel guanine nucleotide exchange factor Ephexin. *Cell* **105**, 233-244.
- Smith, A., Robinson, V., Patel, K. and Wilkinson, D. G.** (1997). The EphA4 and EphB1 receptor tyrosine kinases and ephrin-B2 ligand regulate targeted migration of branchial neural crest cells. *Curr. Biol.* **7**, 561-570.
- Stein, E., Lane, A. A., Cerretti, D. P., Schoecklmann, H. O., Schroff, A. D., Van Etten, R. L. and Daniel, T. O.** (1998). Eph receptors discriminate specific ligand oligomers to determine alternative signaling complexes, attachment, and assembly responses. *Genes Dev.* **12**, 667-678.
- Swartz, M. E., Eberhart, J., Pasquale, E. B. and Krull, C. E.** (2001). EphA4/ephrin-A5 interactions in muscle precursor cell migration in the avian forelimb. *Development* **128**, 4669-4680.
- Teillet, M. A., Kalcheim, C. and Le Douarin, N. M.** (1987). Formation of the dorsal root ganglia in the avian embryo: segmental origin and migratory behavior of neural crest progenitor cells. *Dev. Biol.* **120**, 329-347.
- Testaz, S., Delannet, M. and Duband, J. L.** (1999). Adhesion and migration of avian neural crest cells on fibronectin require cooperating activities of multiple integrins of the  $\beta 1$  and  $\beta 3$  families. *J. Cell Sci.* **112**, 4715-4728.
- Wang, H. U. and Anderson, D. J.** (1997). Eph family transmembrane ligands can mediate repulsive guidance of trunk neural crest migration and motor axon outgrowth. *Neuron* **18**, 383-396.
- Wang, H. U., Chen, Z. F. and Anderson, D. J.** (1998). Molecular distinction and angiogenic interaction between embryonic arteries and veins revealed by ephrin-B2 and its receptor Eph-B4. *Cell* **93**, 741-753.
- Yamashiro, S., Yamakita, Y., Ono, S. and Matsumura, F.** (1998). Fascin, an actin-bundling protein, induces membrane protrusions and increases cell motility of epithelial cells. *Mol. Biol. Cell* **9**, 993-1006.
- Zhou, J. X., Wang, B., Kalo, M. S., Zisch, A. H., Pasquale, E. B. and Ruoslahti, E.** (1999). An Eph receptor regulates integrin activity through R-Ras. *Proc. Natl Acad. Sci. USA*, **96**, 13813-13818.
